# Supplementary material
Source: Springer Nature journal article supplement (https://www.springerprofessional.de/resource/supplementary/13174_2012_3_MOESM4_ESM.pdf/10784746)

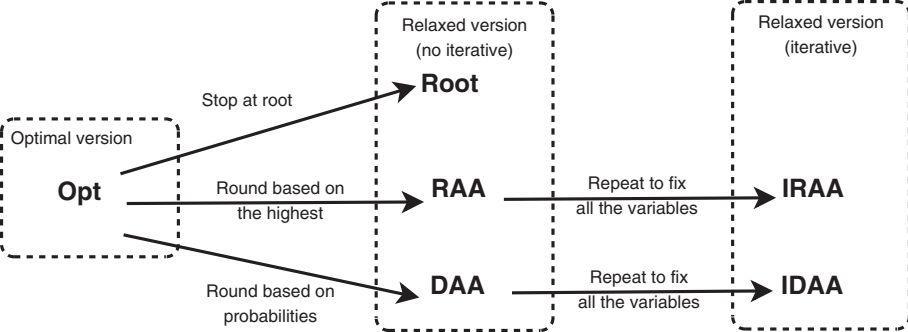

Supplement: MOESM4 [file 10784746]
